# Supplementary material for: Modulation of conductance using light-induced morphological change of a layered π-structure
Source: Royal Society of Chemistry journal article supplement (doi:10.1039/d2tc03332a), 2022-01-01
Supplement: d2tc03332a1.pdf [file d2tc03332a1.pdf]

## Supporting Information

### Modulation of conductance using light-induced morphological change of a layered $\pi$ -structure

Sheelbhadra Chatterjee, Munshi Sahid Hossain, Sariful Molla, Subhajit Bandyopadhyay\*

*Department of Chemical Sciences, Indian Institute of Science Education and Research (IISER)  
Kolkata, Mohanpur, Nadia 741246, India*

E-mail: [sb1@iiserkol.ac.in](mailto:sb1@iiserkol.ac.in)

---

### CONTENTS

|                                                                                           |        |
|-------------------------------------------------------------------------------------------|--------|
| Materials and instruments.....                                                            | S3     |
| Methods.....                                                                              | S3     |
| Synthetic scheme: Scheme S1.....                                                          | S4     |
| Figure S1. $^1\text{H}$ -NMR spectrum of compound <b>1</b> .....                          | S5     |
| Figure S2. $^{13}\text{C}$ NMR spectrum of compound <b>1</b> .....                        | S5     |
| Figure S3. $^1\text{H}$ -NMR spectrum of compound <b>2</b> .....                          | S6     |
| Figure S4. $^{13}\text{C}$ NMR spectrum of compound <b>2</b> .....                        | S6     |
| Figure S5. $^1\text{H}$ NMR spectrum of compound <b>3</b> .....                           | S7     |
| Figure S6. $^{13}\text{C}$ NMR spectrum of compound <b>3</b> .....                        | S7     |
| Figure S7. $^1\text{H}$ NMR spectrum of compound <b>4</b> .....                           | S8     |
| Figure S8. $^{13}\text{C}$ NMR spectrum of compound <b>4</b> .....                        | S8     |
| Photoisomerization studies.....                                                           | S9     |
| Figure S9. Photoisomerization in DMF.....                                                 | S9     |
| Figure S10. Kinetics of <i>open</i> to <i>closed</i> isomerization in DMF.....            | S9-S10 |
| Figure S11. Arrhenius and Eyring plot for <i>open</i> to <i>closed</i> isomerization..... | S10    |
| Table S1. Thermodynamic parameters.....                                                   | S10    |
| Figure S12. Rate of both forward and reverse isomerization.....                           | S11    |
| Figure S13. Change in absorption spectra of <b>1o</b> in different DMF/water systems..... | S11    |
| Figure S14. Change in emission spectra of <b>1c</b> in different THF/water systems.....   | S12    |

|                                                                                 |     |
|---------------------------------------------------------------------------------|-----|
| Figure S15. SEM image of <b>1c</b> in pure solvents.....                        | S12 |
| Figure S16. SEM image of <b>1c</b> in THF/H <sub>2</sub> O (80:20).....         | S13 |
| Figure S16. SEM image of <b>1o</b> in pure DMF.....                             | S13 |
| Figure S17. Solution phase current measurement in cyclic voltammetry.....       | S14 |
| Figure S18. Multiple cycles of conductance switching in cyclic voltammetry..... | S14 |
| Figure S19. Schematic representation of HOMO-LUMO energy gap.....               | S15 |
| Table S2. Cartesian coordinate of DHP-TPE ( <b>1c</b> ).....                    | S16 |
| Table S3. Cartesian coordinate of DHP-TPE ( <b>1o</b> ).....                    | S25 |

## Materials and instruments:

All the reagents employed were commercially available from commercial sources and were used without further purification. Solvents were purified and dried by standard methods. Tetrahydrofuran (THF) and 1,2-dichloromethane (DCM) were distilled freshly over sodium/benzophenone and anhydride  $\text{CaH}_2$ , respectively, prior to use. All other solvents used for synthesis and purification were freshly distilled prior to use. (i.e. DMF). A dry nitrogen/argon atmosphere was maintained during the reactions using flame-dried glassware, unless otherwise indicated. Column chromatography was carried out with a silica-gel of 100-200 mesh, Merck. Reactions were monitored by thin-layer chromatography (TLC) using Merck plates (TLC Silica Gel 60 F254). Yields refer to use chromatographically and spectroscopically pure compounds. The structures of the compounds were determined by NMR spectroscopy, mass spectrometry, XRD analysis and a plethora of other spectroscopic techniques.  $^1\text{H}$  NMR spectra were recorded on 400 MHz Jeol and 500 MHz Bruker spectrometer. Chemical shifts are reported as  $\delta$  values relative to an internal reference of tetramethylsilane (TMS) for  $^1\text{H}$  NMR or the solvent peak. In the case of  $^{13}\text{C}$  NMR the solvent peak was used for calibration.  $^{13}\text{C}$  NMR spectra were recorded on 100 MHz Jeol and 125 MHz Bruker spectrometers with complete proton decoupling. The SEM images were recorded on ZEISS (SUPRA 40 VP) scanning electron microscope with tungsten filament as electron source. The spectroscopic-grade solvents for the spectroscopic experiments were distilled and checked prior to their use to ensure that they were free from any fluorescent impurity. The solid state *I-V* characteristics were measured with Keithley 2450 Source Meter. DLS data were recorded with HORIBA Scientific Nano Partica Nano Particle Analyzer SZ-100. The cyclic voltammetry was performed using BioLogic SP-300.

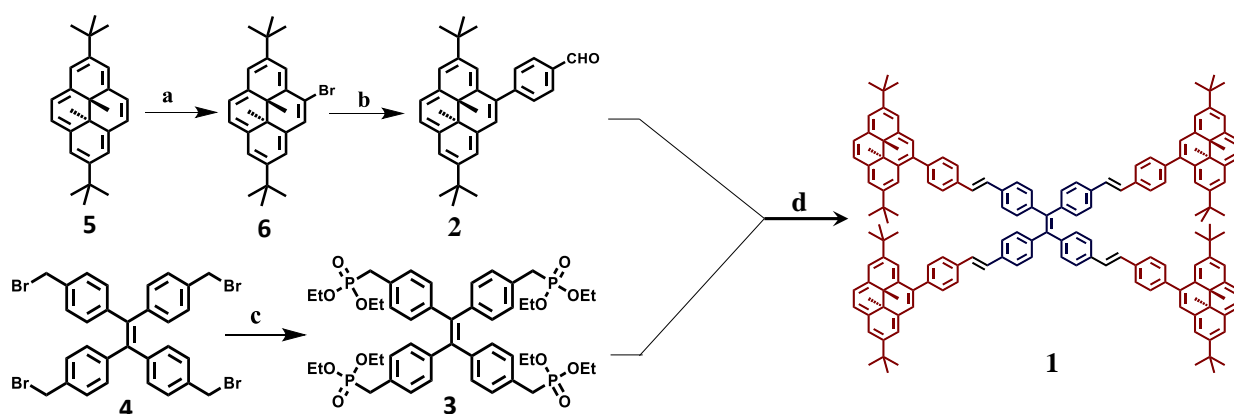

**Scheme S1:** (a) NBS (0.9eq), dry DCM/DMF, 0 °C to rt, 14 h; (b) 4-formylphenyl boronic acid (1.5 eq), Pd(PPh<sub>3</sub>)<sub>2</sub>Cl<sub>2</sub> (10 mol%), Et<sub>3</sub>N, dry DMF, N<sub>2</sub>, 80 °C, 16 h. (c) P(OEt)<sub>3</sub> (5 mL), N<sub>2</sub>, 120 °C, 30 h; (d) compound **2** (4.5 eq), <sup>t</sup>BuOK (4.5 eq), dry THF, reflux, N<sub>2</sub>, 30 h;

The unsubstituted DHP **5** was synthesized according to the reported literature<sup>1</sup>. The purity of the synthesized compound was confirmed from <sup>1</sup>H NMR data which was consistent with the reported values. Bromination of the parent DHP was done following the reported procedure to afford the bromo-DHP **6** and the <sup>1</sup>H data was consistent with the literature.<sup>2</sup>

**Synthesis of 1,1,2,2-tetrakis(4-(bromomethyl)phenyl)ethene (**4**):** HBr in acetic acid (33% v/v) (5 mL) was added to TPE (0.2 g, 0.60 mmol) and the mixture was stirred at 80 °C for 48 h under N<sub>2</sub> atmosphere. The excess acid was neutralised with a 0.1 M solution of Na<sub>2</sub>CO<sub>3</sub> followed by washing with water and extraction in dichloromethane. The organic layer was dried over anhydrous Na<sub>2</sub>SO<sub>4</sub> and concentrated under reduced pressure. Upon column chromatography over silica gel (ethylacetate/hexane 1:19), 0.35 g (yield 82%) of pure product **4** was isolated as a white solid. <sup>1</sup>H NMR (CDCl<sub>3</sub>, 400MHz) δ 7.13 (d, J = 7.9 Hz, 8H), 6.97 (d, J = 7.9 Hz, 8H), 4.41 (s, 8H). <sup>13</sup>C{<sup>1</sup>H} NMR (CDCl<sub>3</sub>, 125 MHz) δ 143.2, 140.6, 136.2, 131.6, 128.6, 33.4.

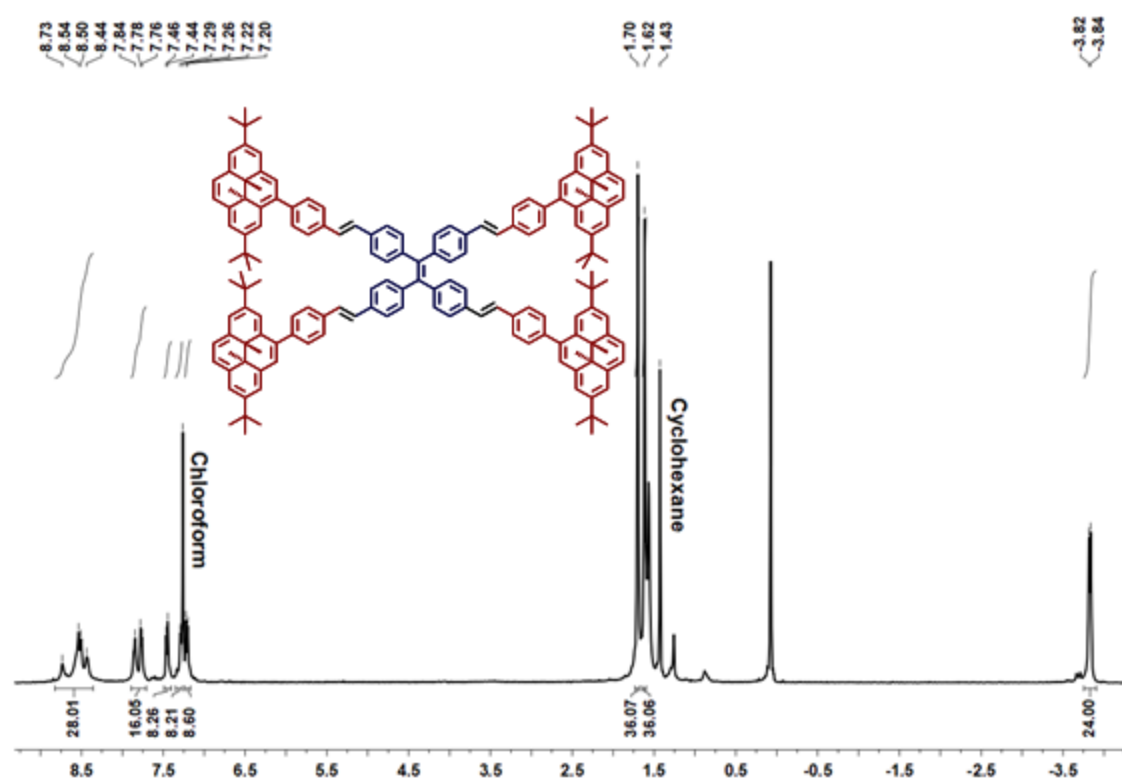

Figure S1:  $^1\text{H}$  NMR ( $\text{CDCl}_3$ , 400 MHz) spectrum of TPE-DHP 1

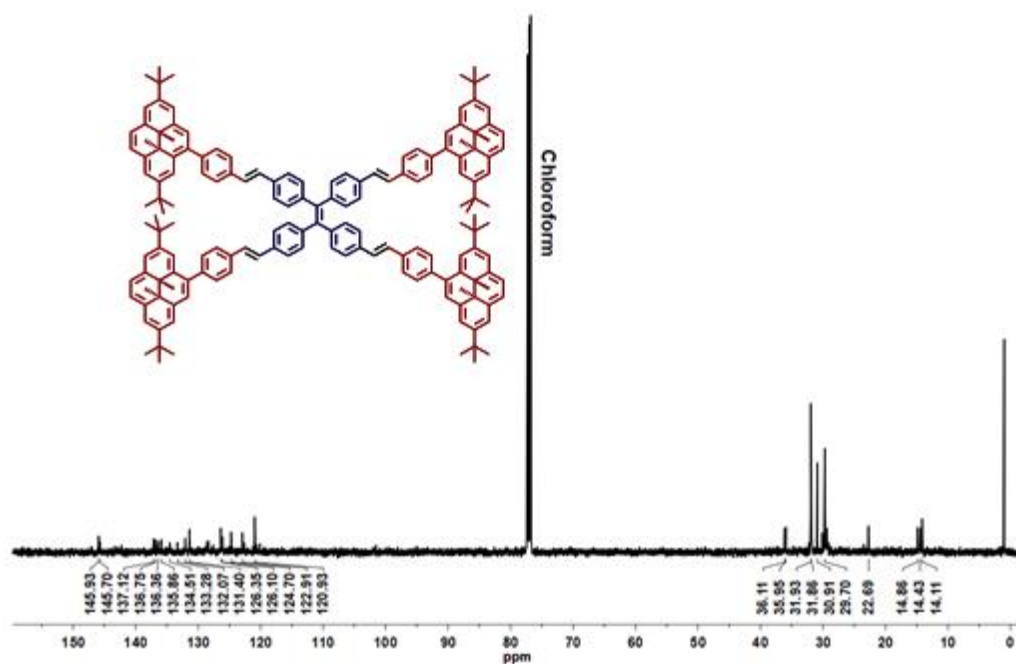

Figure S2:  $^{13}\text{C}$  NMR ( $\text{CDCl}_3$ , 100 MHz) spectrum of TPE-DHP 1

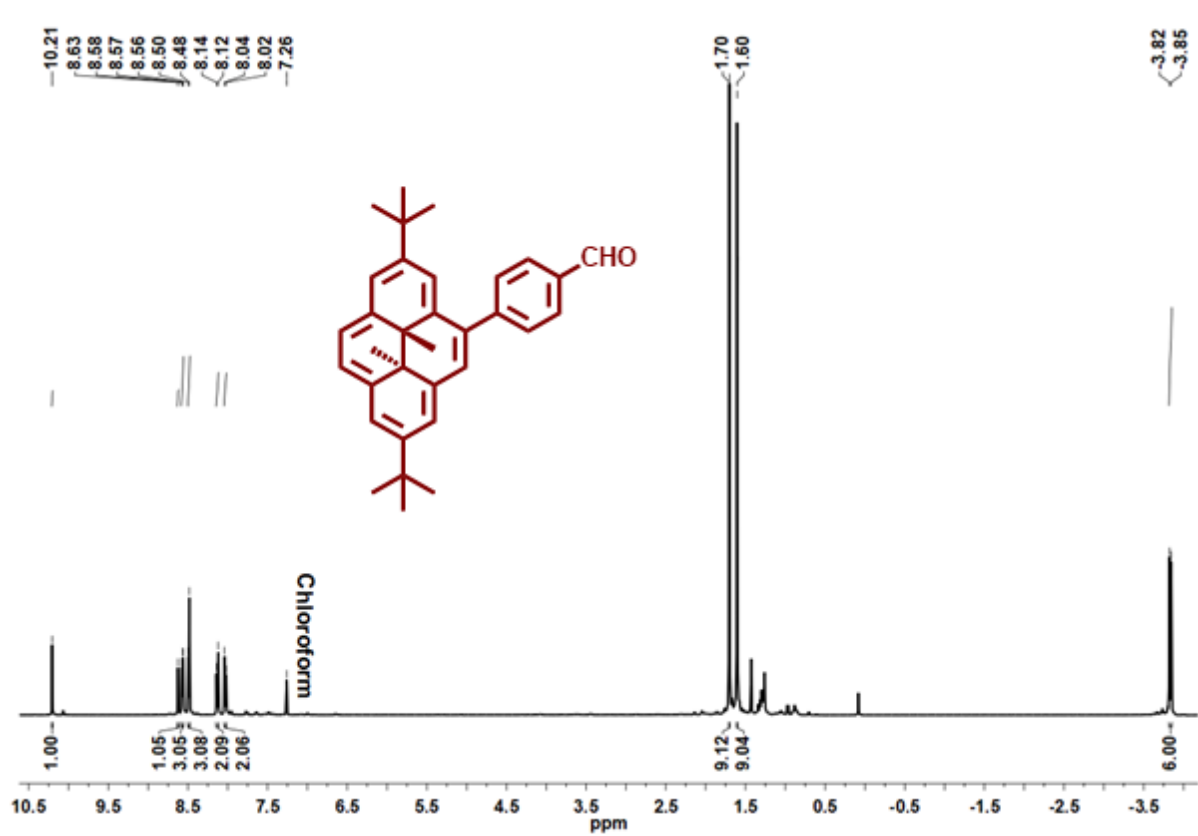

**Figure S3:  $^1\text{H}$  NMR ( $\text{CDCl}_3$ , 400 MHz) spectrum of 2**

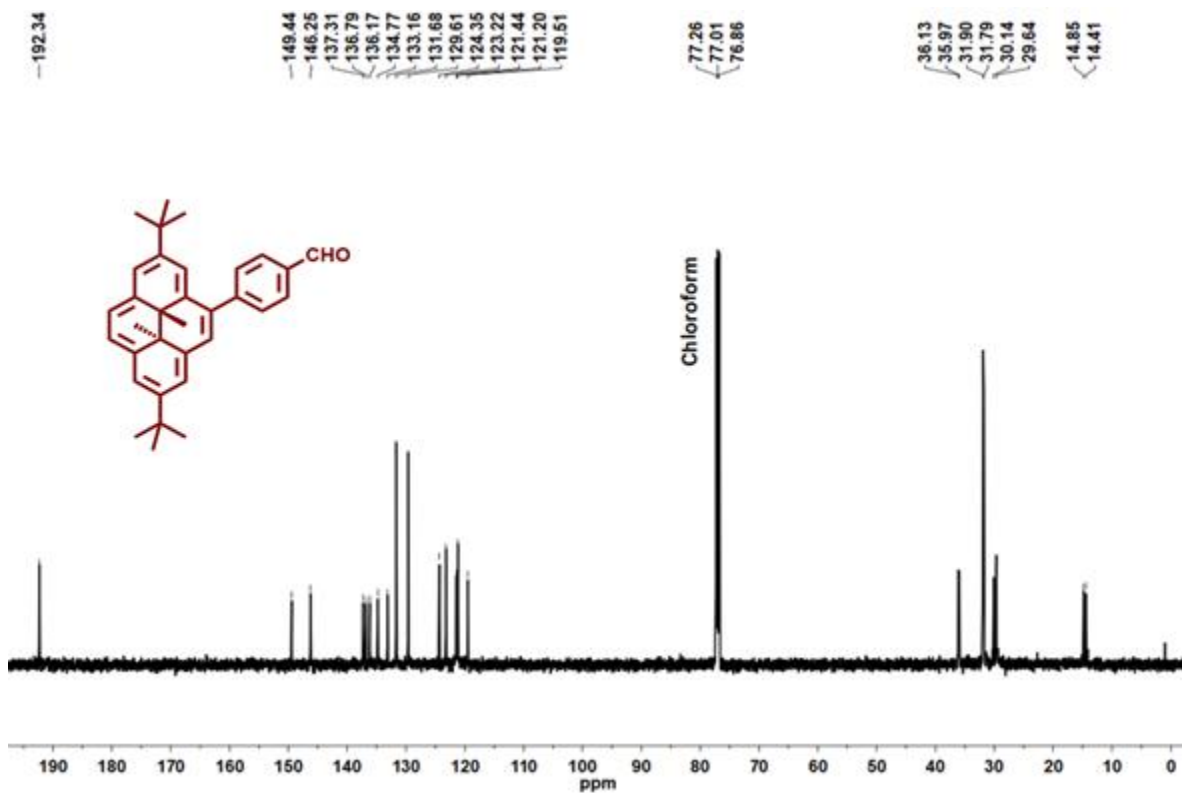

**Figure S4:  $^{13}\text{C}$  NMR ( $\text{CDCl}_3$ , 125 MHz) spectrum of 2**

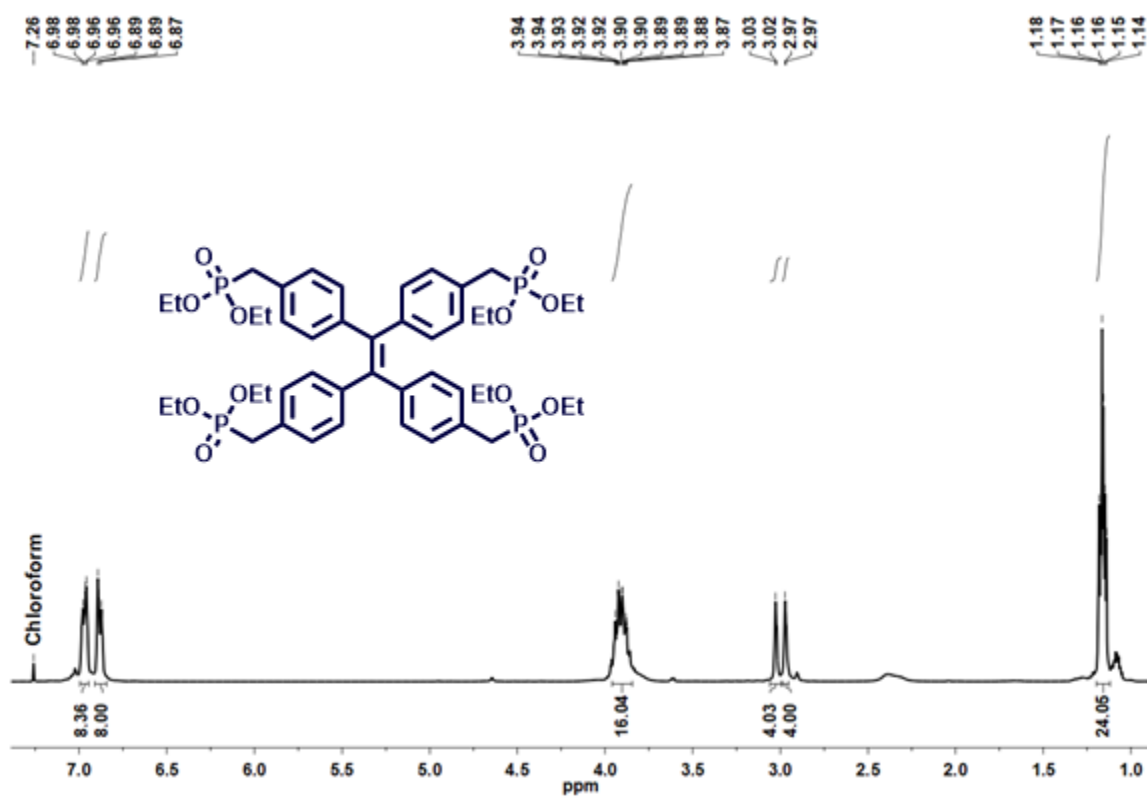

Figure S5: <sup>1</sup>H NMR (CDCl<sub>3</sub>, 400 MHz) spectrum of 3

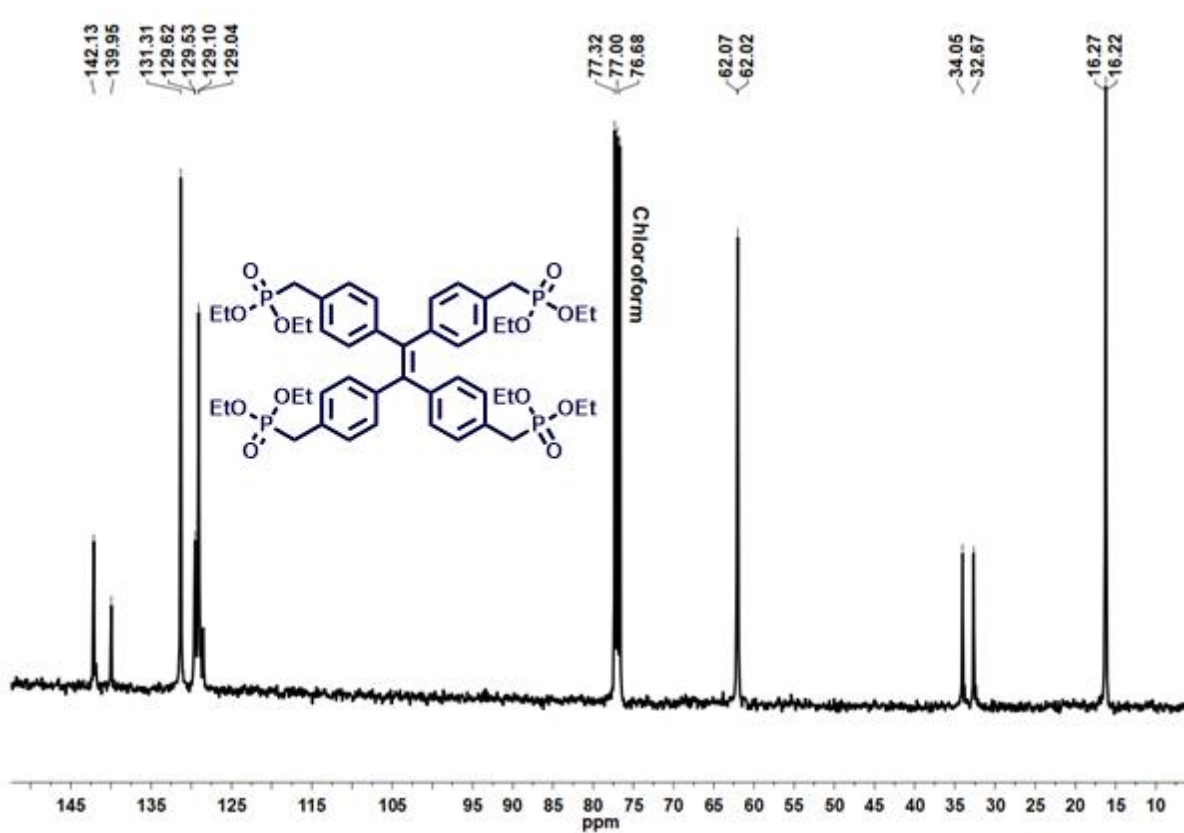

Figure S6: <sup>13</sup>C NMR (CDCl<sub>3</sub>, 100 MHz) spectrum of 3

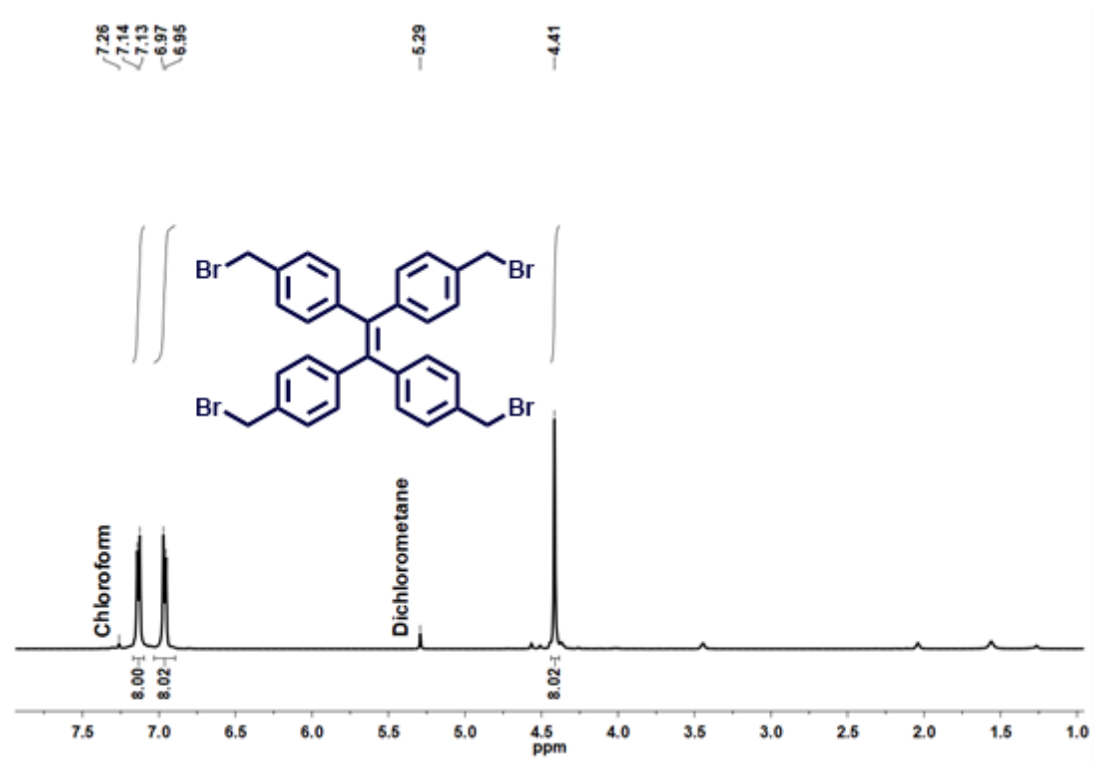

**Figure S7:** <sup>1</sup>H NMR (CDCl<sub>3</sub>, 400 MHz) spectrum of **4**

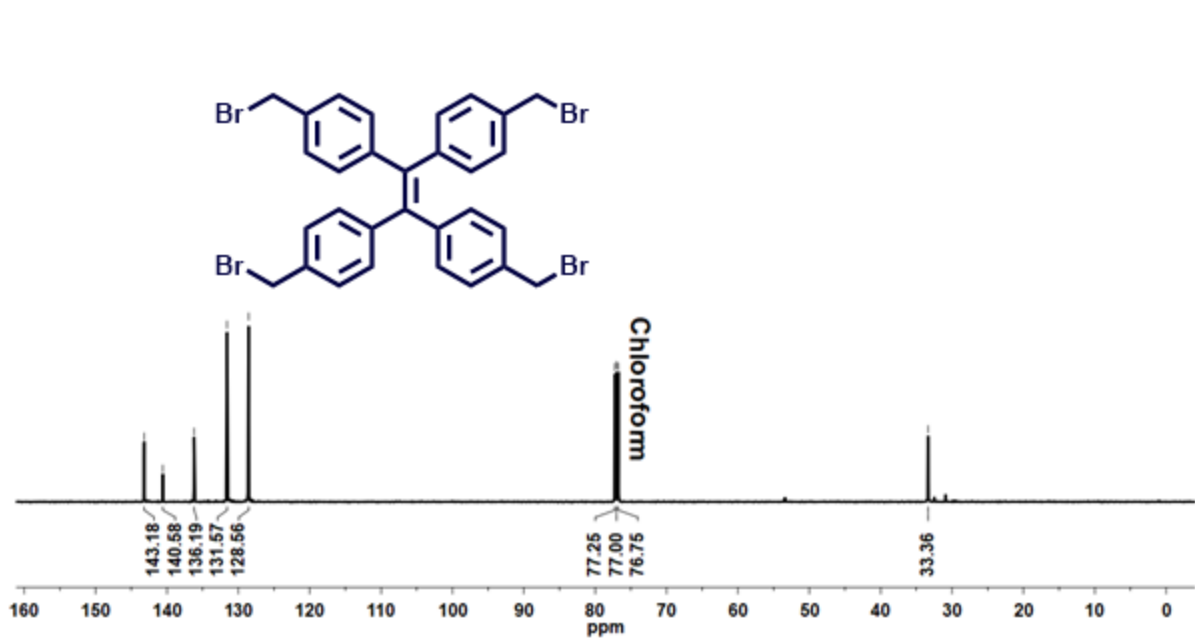

**Figure S8:** <sup>13</sup>C NMR (CDCl<sub>3</sub>, 100 MHz) spectrum of **4**



### Photoisomerization in DMF:

The photoisomerization of compound **1c** ( $10\mu\text{M}$  in DMF, degassed under argon) was monitored with UV-Vis spectroscopy. The reverse isomerization was achieved upon heating at  $65\text{ }^\circ\text{C}$ .

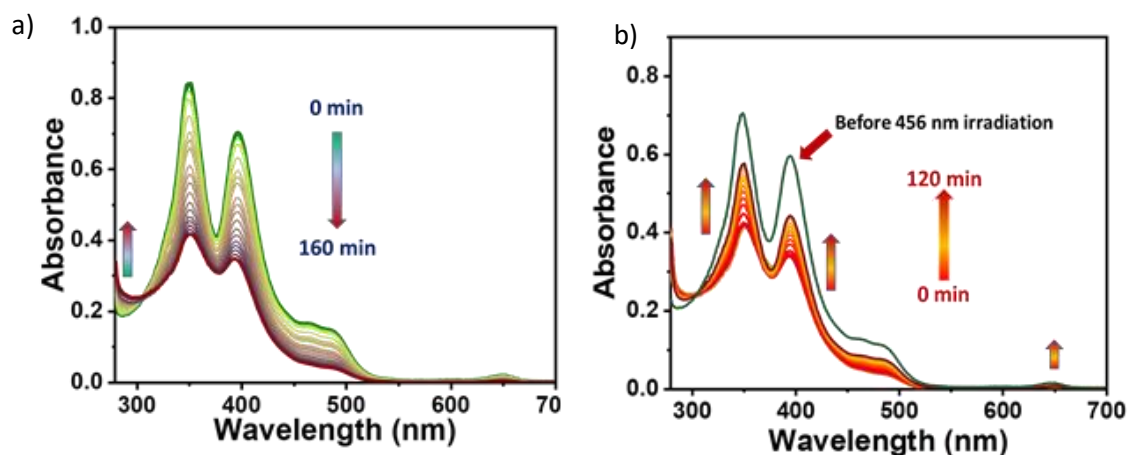

**Figure S9:** a) closed to open isomerization under 525 nm light in DMF b) thermal reversal at  $65\text{ }^\circ\text{C}$  in DMF.

### Kinetics of ring closing:

The thermodynamic parameters obtained from the variable temperature (VT) studies of the reversal of the open-form **1o** to the closed-form **1c** were reported. The UV-vis VT experiments (Figure S10) provide the data which helps to calculate the thermodynamic parameters such as the activation energy, and also the enthalpy and the entropy change of the thermal-reversal process using the Arrhenius plot (Figure S11 a) and the Eyring plot (Figure S11 b). The thermal **1o** $\rightarrow$ **1c** conversion is the ground-state reaction and the thermodynamic parameters (Table S1) namely, activation energy, enthalpy, and entropy, correspond to the ground state-thermal parameters. The high activation energy indicates that the open and the closed isomers are good photochromes with very low thermal reversibility at the room temperature (300 K)

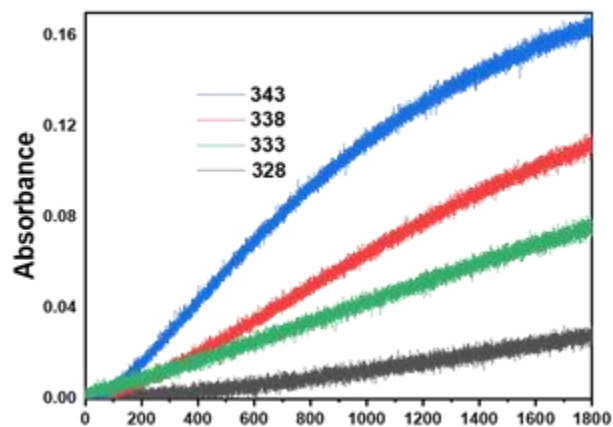

**Figure S10:** Kinetics of ring closing at different temperatures from 55 °C to 70 °C at 5°C temperature interval.

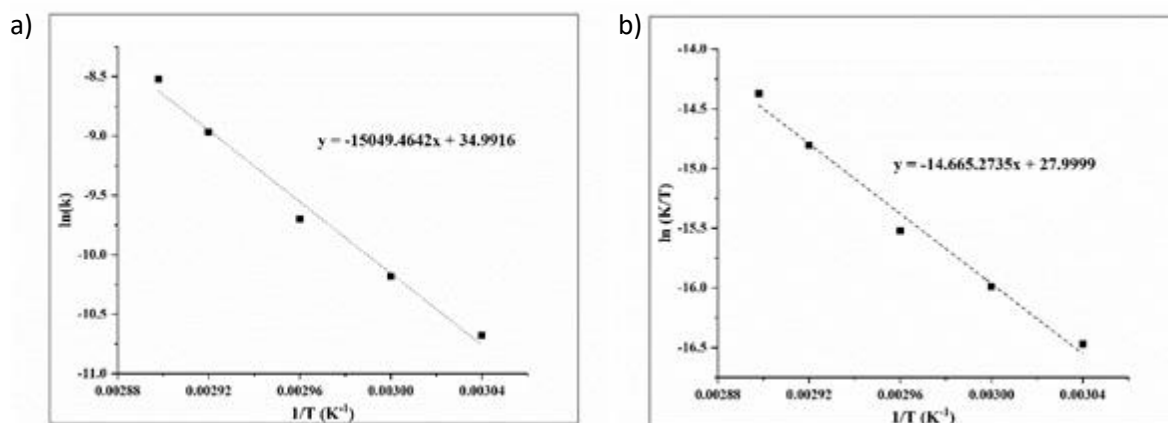

**Figure S11:** a) Arrhenius plot b) Eyring plot of compound 1.

| Compound                                                                                 | DHP-TPE (1)           |
|------------------------------------------------------------------------------------------|-----------------------|
| Activation Energy ( $E_a$ ) for open to closed conversion; (kcal/mol)                    | <b>29.79 kcal/mol</b> |
| Enthalpy of activation ( $\Delta H^\ddagger$ ) for open to closed conversion; (kcal/mol) | <b>29.03 kcal/mol</b> |
| Entropy of activation ( $\Delta S^\ddagger$ ) for open to closed conversion; (cal/mol)   | <b>8.33 cal/mol</b>   |

**Table S1.** Thermodynamic parameters for open to closed isomerization.

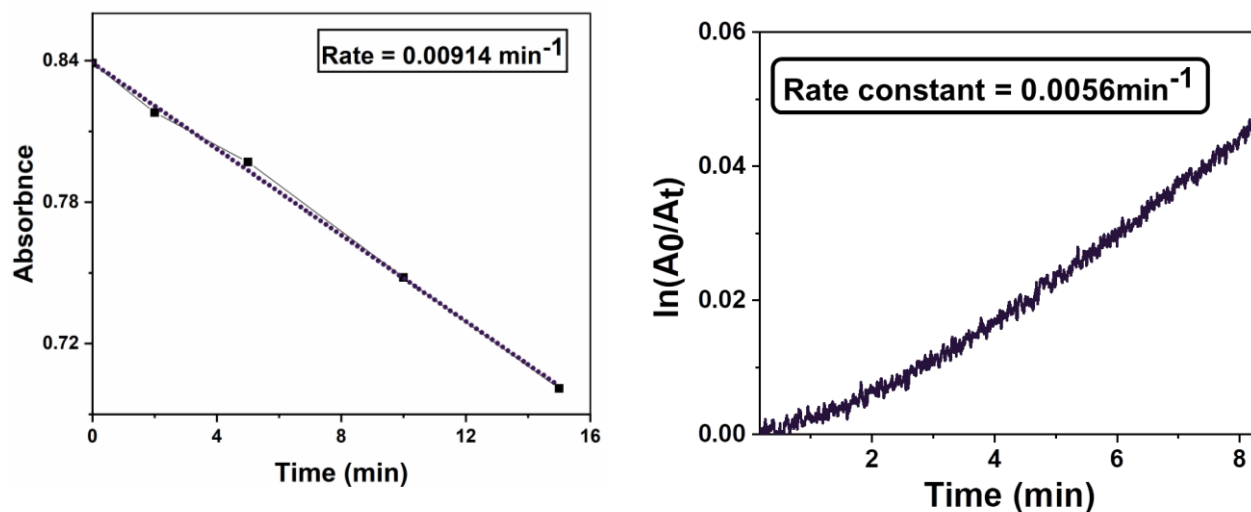

**Figure S12.** a) Rate of **1c** to **1o** photoisomerization (10  $\mu\text{M}$  in THF), b) kinetics of thermal ring closing at 65  $^{\circ}\text{C}$  (10  $\mu\text{M}$  in THF)

The aggregation behaviour of **1o** was also monitored in different DMF/water solvent systems (10  $\mu\text{M}$ ) through UV-Vis spectroscopy, but no significant result was found.

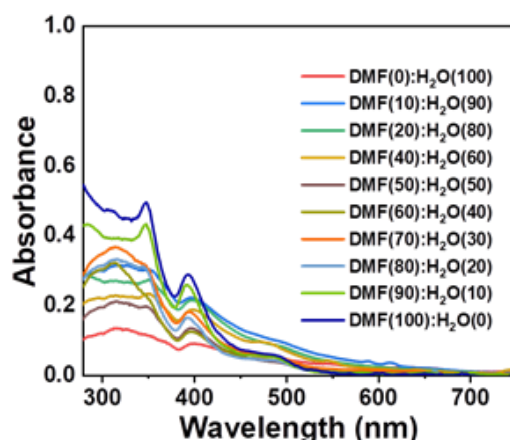

**Figure S13.** Absorption spectra of **1o** in different DMF/water solvent system.

The aggregation induced emission behaviour of **1c** was also monitored in THF/water systems with increasing water percentage in THF. The maximum emission was obtained in 80:20 THF/water system (10  $\mu\text{M}$  of **1c**).

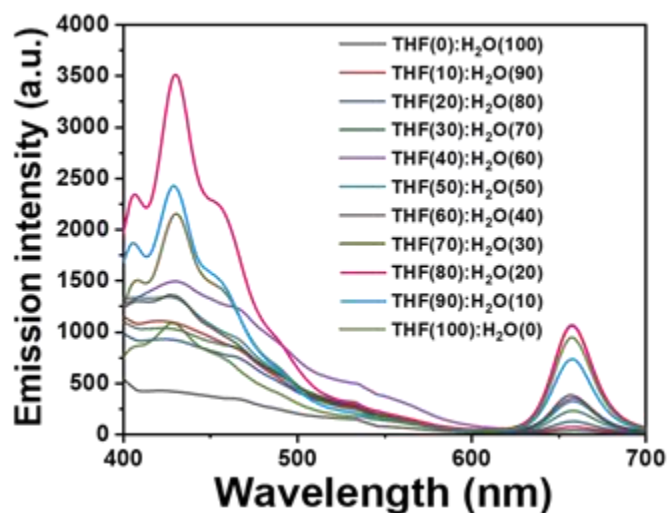

**Figure S14.** Emission spectra of **1c** in different THF/water system.

Samples for microscopic imaging of **1** (both **1c** and **1o**) were prepared through drop cast method followed by spin coating after dissolving the compound in pure solvents.

a)

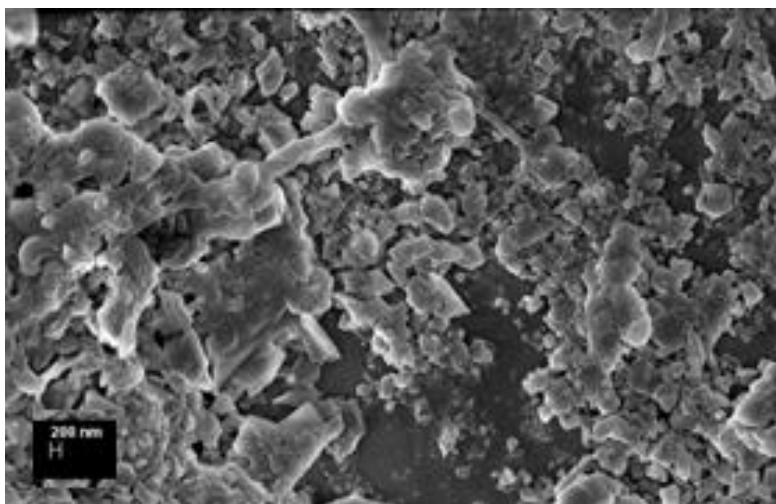

b)

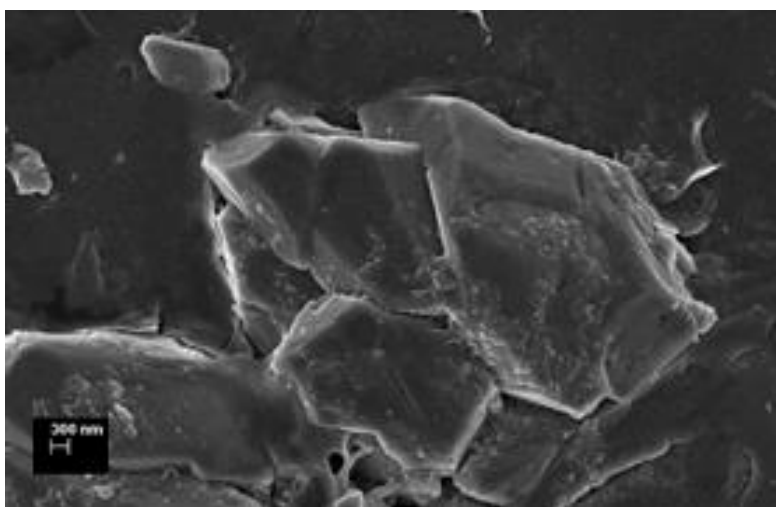

**Figure S15:** SEM images of **1c** in pure a) DMF; b) THF.

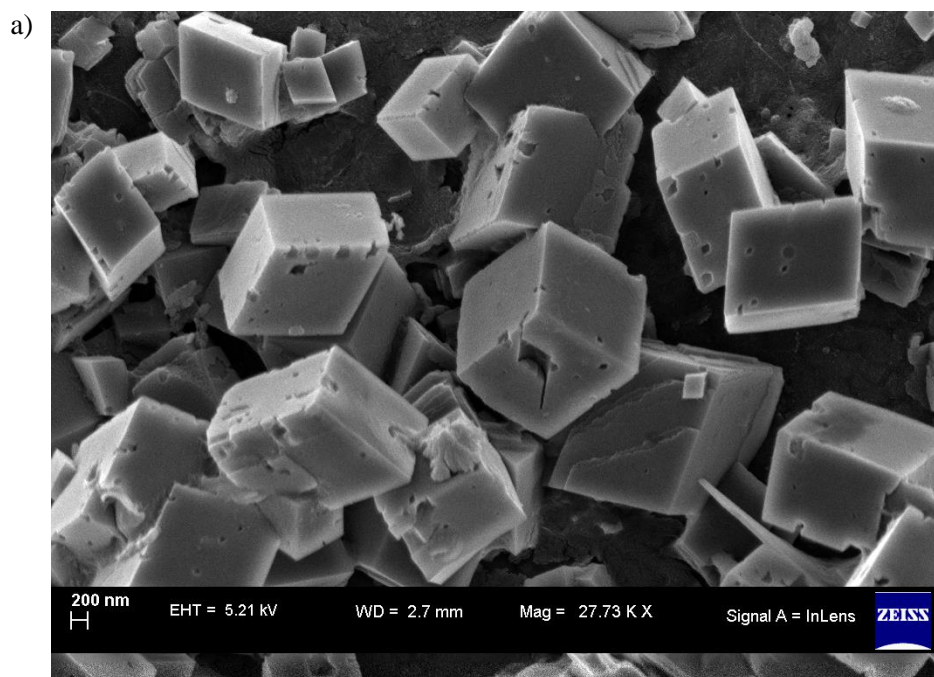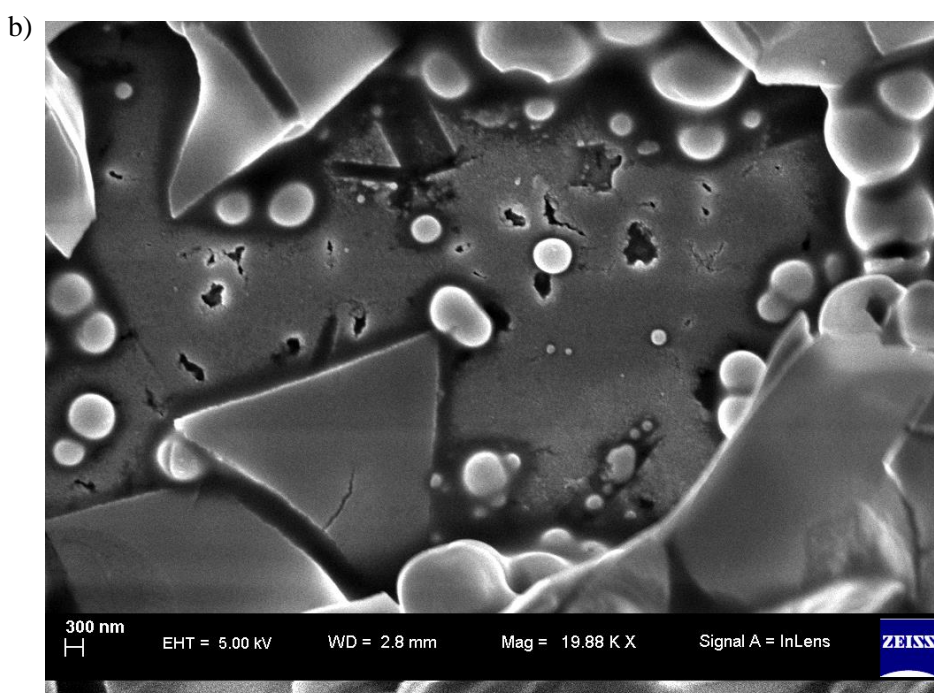

**Figure S16:** a) SEM images of **1c** in 80:20 THF/H<sub>2</sub>O; b) SEM images of **1o** after irradiation of 525 nm light.

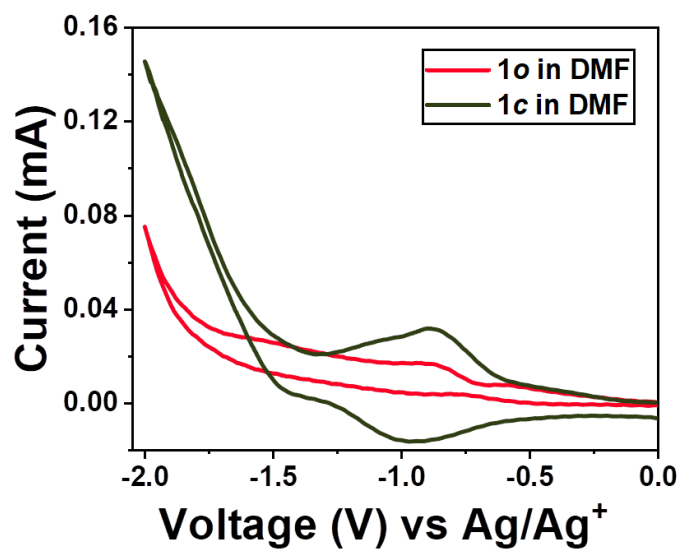

**Figure S17.** Conductance measurement in solution phase for **1c** and **1o** in DMF through cyclic voltammetry.

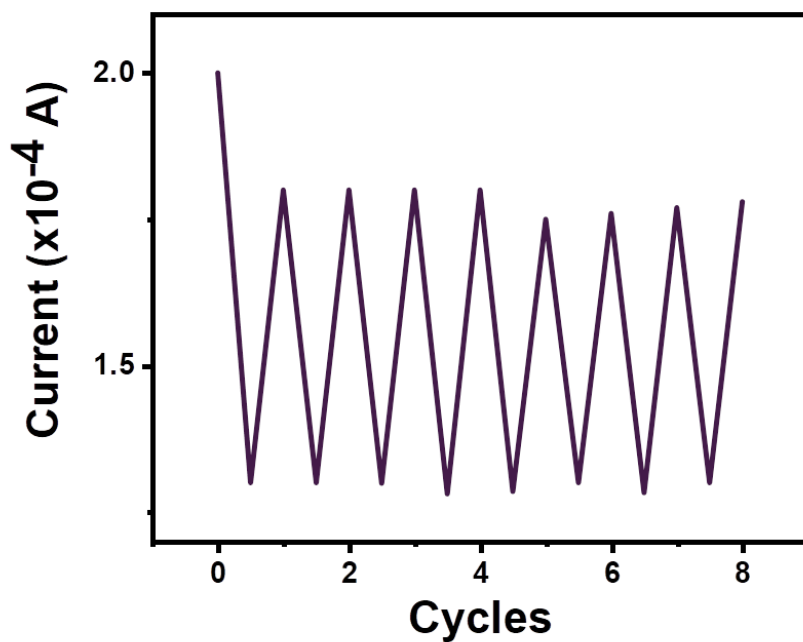

**Figure S18.** Changes in current observed under cyclic voltammetry before and after isomerization in visible light and heating alternatively (**1c**→**1o** and **1o**→**1c**) over multiple cycles.

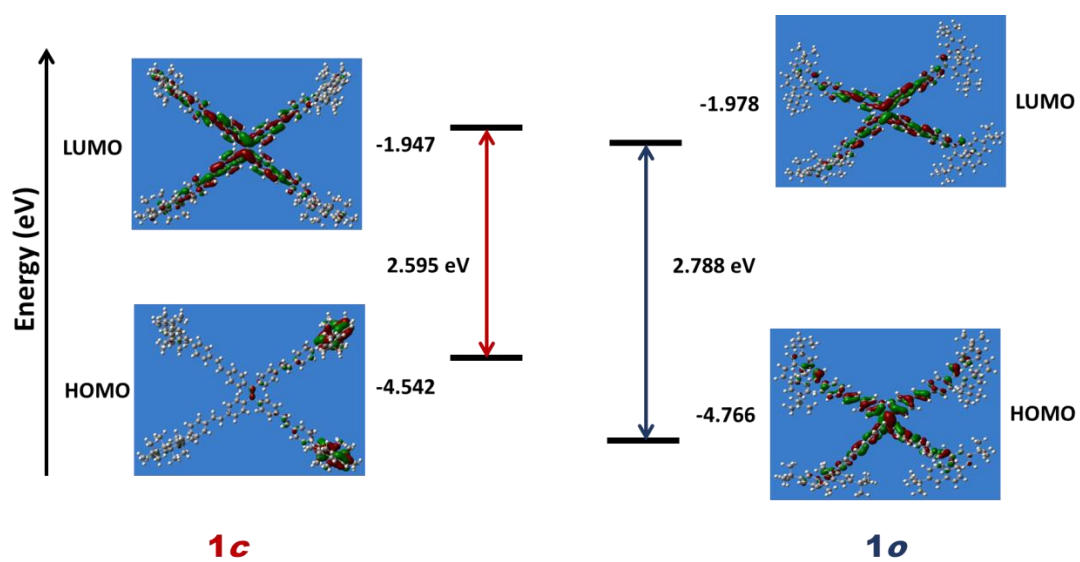

**Figure S19.** HOMO-LUMO energy difference for **1c** and **1o** calculated through DFT.

**Table S2: Cartesian coordinate of DHP-TPE (1c)**

|            |                     |                    |                    |
|------------|---------------------|--------------------|--------------------|
| <b>0 1</b> |                     |                    |                    |
| <b>C</b>   | <b>-0.05087000</b>  | <b>-0.69501700</b> | <b>-0.57268600</b> |
| <b>C</b>   | <b>-1.35297500</b>  | <b>-1.40755000</b> | <b>-0.73281700</b> |
| <b>C</b>   | <b>1.14040100</b>   | <b>-1.58313800</b> | <b>-0.42803100</b> |
| <b>C</b>   | <b>0.04419600</b>   | <b>0.67829800</b>  | <b>-0.56209400</b> |
| <b>C</b>   | <b>-1.14508200</b>  | <b>1.56448400</b>  | <b>-0.39176100</b> |
| <b>C</b>   | <b>1.34499300</b>   | <b>1.39317300</b>  | <b>-0.72337800</b> |
| <b>C</b>   | <b>-2.27770100</b>  | <b>-1.04073700</b> | <b>-1.73099700</b> |
| <b>C</b>   | <b>-3.47425900</b>  | <b>-1.73519600</b> | <b>-1.89089000</b> |
| <b>C</b>   | <b>-3.81157800</b>  | <b>-2.82942100</b> | <b>-1.06410800</b> |
| <b>C</b>   | <b>-2.87764800</b>  | <b>-3.20205500</b> | <b>-0.07077200</b> |
| <b>C</b>   | <b>-1.67731600</b>  | <b>-2.51526100</b> | <b>0.08223600</b>  |
| <b>C</b>   | <b>1.30603700</b>   | <b>-2.71341900</b> | <b>-1.25432300</b> |
| <b>H</b>   | <b>12.32453600</b>  | <b>10.98151900</b> | <b>-0.28266500</b> |
| <b>H</b>   | <b>10.82412800</b>  | <b>10.19767300</b> | <b>-0.83686700</b> |
| <b>H</b>   | <b>11.69376800</b>  | <b>11.31312500</b> | <b>-1.90981700</b> |
| <b>H</b>   | <b>-10.12547500</b> | <b>10.54090900</b> | <b>1.80840400</b>  |
| <b>H</b>   | <b>-11.49922500</b> | <b>11.55038700</b> | <b>1.29237000</b>  |
| <b>H</b>   | <b>-10.41670600</b> | <b>10.83486100</b> | <b>0.08081600</b>  |
| <b>H</b>   | <b>-13.21516300</b> | <b>-6.31260000</b> | <b>-1.74257300</b> |
| <b>H</b>   | <b>-14.49845600</b> | <b>-7.16028600</b> | <b>-2.64087200</b> |
| <b>H</b>   | <b>-13.15794900</b> | <b>-6.39323300</b> | <b>-3.51625600</b> |
| <b>H</b>   | <b>13.87105500</b>  | <b>-7.74906000</b> | <b>3.08060700</b>  |
| <b>H</b>   | <b>12.68678900</b>  | <b>-6.78385400</b> | <b>2.16478700</b>  |
| <b>H</b>   | <b>14.19953100</b>  | <b>-7.30145300</b> | <b>1.39322900</b>  |
| <b>H</b>   | <b>7.52017800</b>   | <b>4.09694600</b>  | <b>-2.49991000</b> |
| <b>H</b>   | <b>9.62530700</b>   | <b>5.32086300</b>  | <b>-2.77410300</b> |
| <b>H</b>   | <b>8.61474500</b>   | <b>7.84888700</b>  | <b>0.55336500</b>  |
| <b>H</b>   | <b>6.50519000</b>   | <b>6.61009000</b>  | <b>0.84858500</b>  |
| <b>H</b>   | <b>6.14370200</b>   | <b>-6.43649600</b> | <b>-0.65175700</b> |
| <b>H</b>   | <b>8.08222100</b>   | <b>-7.91189300</b> | <b>-0.38396100</b> |
| <b>H</b>   | <b>9.50694000</b>   | <b>-5.48621900</b> | <b>2.86725500</b>  |
| <b>H</b>   | <b>7.55052700</b>   | <b>-4.00907900</b> | <b>2.61723400</b>  |
| <b>H</b>   | <b>-11.90072000</b> | <b>9.95246000</b>  | <b>-4.05103900</b> |



|   |              |              |             |
|---|--------------|--------------|-------------|
| H | -10.95299900 | 8.95503200   | -5.16918300 |
| H | -10.16117900 | 9.74307400   | -3.78717800 |
| H | -11.88853600 | -7.93893300  | -7.52929600 |
| H | -10.36857500 | -7.40919500  | -8.27238800 |
| H | -11.12808800 | -6.42871700  | -6.99968600 |
| H | 12.30243900  | 11.91594800  | -7.35421300 |
| H | 12.06866800  | 12.40544800  | -5.66190300 |
| H | 11.26096000  | 10.95750400  | -6.28639200 |
| H | 15.83351700  | -8.46296700  | -3.74049900 |
| H | 15.92560300  | -7.79201400  | -2.09748700 |
| H | 14.39980200  | -7.73260700  | -2.99594700 |
| H | -6.02863700  | 6.54037700   | -0.33503300 |
| H | -7.95930200  | 8.01514600   | -0.02885700 |
| H | -9.59172200  | 5.30995900   | 2.88595000  |
| H | -7.64559300  | 3.82414000   | 2.59185600  |
| H | 11.15522200  | -8.51233200  | 7.59372300  |
| H | 9.65020200   | -7.90581200  | 8.30565500  |
| H | 10.46701100  | -6.98087500  | 7.02682000  |
| H | 8.42616800   | -10.71405500 | 6.10093900  |
| H | 9.93465300   | -10.75429000 | 7.02967300  |
| H | 8.46349800   | -10.09278100 | 7.76536300  |
| H | 7.40779100   | -8.46154400  | 5.36290000  |
| H | 8.22336000   | -6.94095800  | 5.78588000  |
| H | 7.50466500   | -7.94332100  | 7.05335700  |
| H | 13.74873300  | -11.48467300 | -2.86281500 |
| H | 13.10024900  | -9.95038000  | -3.46743100 |
| H | 14.57041600  | -10.62966100 | -4.18659400 |
| H | 16.01408900  | -11.55893600 | -1.66831000 |
| H | 16.88569800  | -10.05227400 | -1.30535700 |
| H | 16.74157000  | -10.61810800 | -2.97707900 |
| H | 12.53503200  | -8.45217300  | -1.87714600 |
| H | 15.41953300  | -10.77557500 | 0.32031700  |
| H | 11.79961400  | -9.94172300  | 5.97378800  |
| H | 8.87528200   | -7.65789500  | 3.80325200  |
| H | 10.55394400  | -7.49216700  | -0.71893400 |
| H | 13.80643300  | -10.85114800 | 4.82354600  |
| H | 15.10703500  | -11.19639100 | 2.75768700  |

|   |              |             |             |
|---|--------------|-------------|-------------|
| H | 12.94315600  | 8.57767800  | 4.42837500  |
| H | 11.98066300  | 7.50124600  | 5.45521000  |
| H | 11.18420700  | 8.50607800  | 4.22477200  |
| H | 13.61154200  | 5.08466600  | 3.05824300  |
| H | 14.40139400  | 6.52748400  | 3.71715600  |
| H | 13.40787600  | 5.50632200  | 4.77240000  |
| H | 11.04268600  | 4.98086800  | 2.85530400  |
| H | 10.05704800  | 6.36452100  | 3.37540100  |
| H | 10.95756400  | 5.41957000  | 4.56868900  |
| H | 14.44038800  | 8.88774600  | -6.64194800 |
| H | 12.68611300  | 8.85166600  | -6.88967200 |
| H | 13.70161000  | 9.86594300  | -7.92876200 |
| H | 15.59811300  | 11.03158800 | -5.84679900 |
| H | 14.63401700  | 12.45627800 | -5.39707100 |
| H | 14.74908000  | 11.95679700 | -7.09195000 |
| H | 11.45071400  | 9.05774500  | -5.01474000 |
| H | 15.07448800  | 10.97173400 | -3.69099600 |
| H | 14.13850400  | 8.46957100  | 2.52345500  |
| H | 10.54238300  | 6.50419300  | 1.22593200  |
| H | 10.08586100  | 7.72001700  | -3.42282100 |
| H | 15.46897100  | 9.85120100  | 0.94298900  |
| H | 15.83937200  | 10.72961700 | -1.33075200 |
| H | -11.00063700 | 10.48240000 | 7.00070100  |
| H | -12.06247500 | 11.35500600 | 8.11894000  |
| H | -11.70911400 | 12.03196700 | 6.51415400  |
| H | -14.27840600 | 8.54070300  | 6.92607500  |
| H | -12.54046000 | 8.38391000  | 7.23320100  |
| H | -13.55521600 | 9.30453200  | 8.35850100  |
| H | -15.29170600 | 10.83042700 | 6.30665500  |
| H | -14.24091000 | 12.25972500 | 6.18704500  |
| H | -14.51547400 | 11.48966500 | 7.75523400  |
| H | -12.83918800 | 6.36465700  | -3.17507800 |
| H | -13.50622000 | 7.92023200  | -3.70014500 |
| H | -12.50768600 | 6.96925300  | -4.81293600 |
| H | -10.30757300 | 6.05629300  | -2.91094600 |
| H | -9.21150600  | 7.44019500  | -3.11154600 |
| H | -10.05344800 | 6.76063900  | -4.51304600 |

|   |              |              |             |
|---|--------------|--------------|-------------|
| H | -13.25679500 | 9.60986100   | -2.23296100 |
| H | -9.99961300  | 7.09937800   | -0.99108700 |
| H | -11.14436000 | 8.84483500   | 5.46565600  |
| H | -14.46547100 | 11.27939200  | 4.20563000  |
| H | -15.00927500 | 11.51094400  | 1.78653500  |
| H | -14.58956800 | 10.86512400  | -0.55836400 |
| H | -9.74035100  | 7.68087400   | 3.78987000  |
| H | -7.59213500  | -4.01487000  | -2.42165800 |
| H | -9.70170500  | -5.22748300  | -2.69347800 |
| H | -8.59600300  | -7.90826600  | 0.47980200  |
| H | -6.47437900  | -6.68484100  | 0.76930000  |
| H | -14.77432300 | -7.35727900  | 3.17655900  |
| H | -16.22372500 | -8.04176500  | 3.93163100  |
| H | -16.30326300 | -7.38670200  | 2.28147300  |
| H | -14.22095400 | -11.12648700 | 3.08024400  |
| H | -13.51654800 | -9.60077900  | 3.64193800  |
| H | -14.99363800 | -10.22216300 | 4.40063200  |
| H | -16.49177000 | -11.14252200 | 1.85758400  |
| H | -17.35716300 | -9.61456100  | 1.57856600  |
| H | -17.15591400 | -10.23207400 | 3.22344800  |
| H | -9.23472400  | -10.22940400 | -6.03551600 |
| H | -10.74322100 | -10.21954800 | -6.96546400 |
| H | -9.24748800  | -9.62496200  | -7.70660400 |
| H | -8.09497200  | -8.02868400  | -5.38038100 |
| H | -8.88351700  | -6.47438500  | -5.72549600 |
| H | -8.23513600  | -7.45699800  | -7.04795100 |
| H | -12.53442100 | -9.38702700  | -5.87670500 |
| H | -9.39183800  | -7.42285000  | -3.70397300 |
| H | -12.97741800 | -8.06535200  | 2.02097700  |
| H | -16.07118600 | -10.11686300 | -0.16167300 |
| H | -15.88005100 | -10.42477100 | -2.62545200 |
| H | -14.56564900 | -10.19272400 | -4.70156100 |
| H | -11.00184800 | -7.15722500  | 0.83458800  |
| H | 4.98043200   | 4.95411500   | 0.25570900  |
| H | 5.65676300   | 3.11396900   | -2.10505600 |
| H | -5.59745600  | 3.26716700   | 1.63173600  |
| H | -4.47767800  | 5.07709700   | -0.57889800 |

|   |              |              |             |
|---|--------------|--------------|-------------|
| H | 5.56765300   | -3.36331600  | 1.58500700  |
| H | 4.49588700   | -5.06519900  | -0.73261300 |
| H | -4.97409000  | -4.99135600  | 0.21768000  |
| H | -5.68377100  | -3.09846800  | -2.09113300 |
| H | -1.99046500  | 0.46199000   | 1.26075300  |
| H | -3.90425500  | 1.95239700   | 1.58466200  |
| H | -2.52432800  | 4.42108300   | -1.66648800 |
| H | -0.58256800  | 2.93458200   | -1.96341800 |
| H | 0.98458800   | 2.78995900   | 0.88455800  |
| H | 3.09486000   | 4.00309700   | 0.62058600  |
| H | 4.13611100   | 1.45310400   | -2.69348100 |
| H | 2.02426600   | 0.22026000   | -2.40272200 |
| H | 1.99904200   | -0.50837400  | 1.23579400  |
| H | 3.92071800   | -1.99781600  | 1.51278600  |
| H | 2.51510600   | -4.41160100  | -1.76856300 |
| H | 0.56717400   | -2.92465400  | -2.02029700 |
| H | -0.97584400  | -2.83119300  | 0.84749400  |
| H | -3.09031900  | -4.03792800  | 0.58737500  |
| H | -4.16558000  | -1.43318400  | -2.67288300 |
| H | -2.04981700  | -0.20647400  | -2.38486300 |
| C | 13.71173300  | 7.02897000   | -1.34002800 |
| C | -13.45264800 | 7.80183600   | 2.16383700  |
| C | -12.07660300 | -10.45655300 | -1.26324000 |
| C | 10.93306900  | -10.72458200 | 1.99616300  |
| C | 11.81528500  | 10.54138200  | -1.14396800 |
| C | -10.90049300 | 10.66898700  | 1.04821000  |
| C | -13.42747500 | -6.94351700  | -2.60965000 |
| C | 13.41644700  | -7.59503800  | 2.09852300  |
| C | 7.74602900   | 4.91325900   | -1.82184500 |
| C | 8.94067000   | 5.60968300   | -1.98253500 |
| C | 9.29467800   | 6.67386700   | -1.12531500 |
| C | 8.38737700   | 7.01565900   | -0.10315100 |
| C | 7.19023300   | 6.31862300   | 0.05689800  |
| C | 6.86870700   | -6.21672200  | 0.12495600  |
| C | 7.97119300   | -7.05400000  | 0.27212900  |
| C | 8.94249000   | -6.82517200  | 1.27052800  |
| C | 8.76237000   | -5.70822900  | 2.11009400  |

|   |              |              |             |
|---|--------------|--------------|-------------|
| C | 7.65876100   | -4.86891500  | 1.96154200  |
| C | 6.83701700   | 5.24918400   | -0.79376500 |
| C | 6.68191700   | -5.09936500  | 0.96918800  |
| C | -11.07553700 | 9.23556400   | -4.11568700 |
| C | -10.92707500 | -7.45463800  | -7.32922800 |
| C | 12.18482700  | 11.54354400  | -6.32900300 |
| C | 15.28663600  | -8.34313500  | -2.79704200 |
| C | -6.80664500  | 6.24955100   | 0.36310800  |
| C | -7.90543200  | 7.08734100   | 0.53092900  |
| C | -8.93911400  | 6.77282900   | 1.44110000  |
| C | -8.81037800  | 5.58184400   | 2.18325500  |
| C | -7.71157400  | 4.74154400   | 2.01311800  |
| C | 10.21824400  | -7.99129700  | 7.37099800  |
| C | 9.03306600   | -10.16570200 | 6.83057100  |
| C | 8.05181200   | -7.97537400  | 6.10430500  |
| C | 9.37818300   | -8.74519600  | 6.30153400  |
| C | 14.02371400  | -10.49497000 | -3.24502200 |
| C | 16.21324500  | -10.54025300 | -2.02010000 |
| C | 14.90807400  | -9.73475000  | -2.21683200 |
| C | 12.91612600  | -8.81324600  | -0.92538700 |
| C | 14.12525100  | -9.54197300  | -0.89872700 |
| C | 14.54974600  | -10.12780800 | 0.31442400  |
| C | 11.42246400  | -9.56784300  | 5.02539400  |
| C | 10.19376600  | -8.87072700  | 4.99515000  |
| C | 9.77427300   | -8.25868900  | 3.79567400  |
| C | 10.48965000  | -8.35958000  | 2.59484600  |
| C | 10.13698600  | -7.71059900  | 1.38088100  |
| C | 10.90946700  | -7.92049300  | 0.21496000  |
| C | 12.14507000  | -8.58211600  | 0.21769500  |
| C | 13.44639700  | -10.42534800 | 3.88999700  |
| C | 12.20275800  | -9.76449400  | 3.88753900  |
| C | 11.61243800  | -9.40052400  | 2.52398800  |
| C | 12.73834800  | -8.92077900  | 1.57961900  |
| C | 13.85711000  | -9.95896300  | 1.51610800  |
| C | 14.20718600  | -10.58673600 | 2.72552800  |
| C | 12.07689700  | 7.90799300   | 4.44088300  |
| C | 13.49223700  | 5.91871800   | 3.75929700  |

|   |              |             |             |
|---|--------------|-------------|-------------|
| C | 10.99492200  | 5.82576600  | 3.55148000  |
| C | 12.22585700  | 6.75110200  | 3.41262700  |
| C | 13.56906400  | 9.49899600  | -6.90340600 |
| C | 14.67820700  | 11.58679900 | -6.06283300 |
| C | 13.42243600  | 10.69563300 | -5.92171600 |
| C | 12.11417700  | 9.34601200  | -4.20346600 |
| C | 13.22779600  | 10.16801200 | -4.48256900 |
| C | 14.16427400  | 10.43007600 | -3.45814000 |
| C | 13.46564700  | 8.19025800  | 1.71678800  |
| C | 12.37323400  | 7.33682100  | 1.99035400  |
| C | 11.41763100  | 7.09060600  | 0.98264100  |
| C | 11.52737300  | 7.60328900  | -0.31698100 |
| C | 10.56012400  | 7.43140600  | -1.34373400 |
| C | 10.79677800  | 7.95713300  | -2.63516600 |
| C | 11.85378700  | 8.82874000  | -2.93094100 |
| C | 14.75846400  | 9.60931100  | 0.15615200  |
| C | 13.69904500  | 8.73027000  | 0.45340400  |
| C | 12.87127300  | 8.21640600  | -0.72596600 |
| C | 12.65940900  | 9.35510500  | -1.74965800 |
| C | 14.00104800  | 9.96565200  | -2.15051900 |
| C | 14.94738700  | 10.14282800 | -1.12465200 |
| C | -11.90035500 | 11.10313500 | 7.06355600  |
| C | -13.39294100 | 9.06780900  | 7.29963300  |
| C | -14.37369200 | 11.29323000 | 6.68645000  |
| C | -13.14719900 | 10.37227500 | 6.49053300  |
| C | -12.63105200 | 7.26530900  | -3.76378900 |
| C | -10.15655400 | 6.99920500  | -3.44836800 |
| C | -11.34341100 | 7.97070500  | -3.25215700 |
| C | -12.57764200 | 9.27836300  | -1.45160700 |
| C | -11.53041900 | 8.39281200  | -1.77731400 |
| C | -10.72341900 | 7.86385900  | -0.74449200 |
| C | -11.81839600 | 9.17229100  | 4.67831500  |
| C | -12.90536100 | 10.01411600 | 5.00734500  |
| C | -13.69537000 | 10.55284700 | 3.97041200  |
| C | -13.49144300 | 10.23574100 | 2.62326200  |
| C | -14.20668600 | 10.81294800 | 1.56062800  |
| C | -13.93803300 | 10.48399300 | 0.22439300  |

|   |              |              |             |
|---|--------------|--------------|-------------|
| C | -12.83599300 | 9.69145400   | -0.14360500 |
| C | -10.40869100 | 8.02355200   | 3.00393000  |
| C | -11.52929000 | 8.78424200   | 3.36818100  |
| C | -12.54503200 | 9.08702900   | 2.27409800  |
| C | -11.80743800 | 9.38349200   | 0.94562800  |
| C | -10.85566600 | 8.23189600   | 0.59729600  |
| C | -10.09489900 | 7.68281200   | 1.66925200  |
| C | -7.79116500  | -4.87175600  | -1.78657500 |
| C | -8.98847200  | -5.56289900  | -1.94792100 |
| C | -9.31157100  | -6.67523300  | -1.13912900 |
| C | -8.37894300  | -7.05328000  | -0.15273800 |
| C | -7.17867800  | -6.36301200  | 0.00682200  |
| C | -15.67698400 | -7.94668700  | 2.98527300  |
| C | -14.45975900 | -10.12173100 | 3.44750700  |
| C | -16.66316100 | -10.13347300 | 2.24955500  |
| C | -15.33820300 | -9.35472400  | 2.41960300  |
| C | -9.81920400  | -9.66516100  | -6.77111800 |
| C | -8.75134300  | -7.50215100  | -6.08225600 |
| C | -10.10647200 | -8.22601800  | -6.25747600 |
| C | -12.18050600 | -8.92435000  | -4.95891000 |
| C | -10.92008300 | -8.29337400  | -4.94531600 |
| C | -10.40478000 | -7.80053000  | -3.72495600 |
| C | -13.32434200 | -8.52436600  | 1.09881100  |
| C | -14.56080500 | -9.20966500  | 1.09251100  |
| C | -15.07800700 | -9.68224600  | -0.13167300 |
| C | -14.38508100 | -9.56160600  | -1.34092200 |
| H | 13.19660800  | 6.58782400   | -2.19710300 |
| H | 13.83966600  | 6.25804500   | -0.57470600 |
| H | 14.69948300  | 7.37460400   | -1.65599100 |
| H | -13.94151600 | 7.63288800   | 3.12784400  |
| H | -12.85157200 | 6.92195400   | 1.91894100  |
| H | -14.22321200 | 7.93235100   | 1.39973900  |
| H | -12.34458600 | -11.01248400 | -0.35993100 |
| H | -11.00592900 | -10.23703300 | -1.23260400 |
| H | -12.28844000 | -11.08226900 | -2.13402700 |
| H | 10.47406800  | -10.56488000 | 1.01721400  |
| H | 10.15365200  | -11.02391400 | 2.70278800  |

|   |              |              |             |
|---|--------------|--------------|-------------|
| H | 11.66469100  | -11.53321700 | 1.92012600  |
| C | 2.40596900   | -3.55587800  | -1.10773000 |
| C | 3.38577200   | -3.32637800  | -0.11720000 |
| C | 3.20403200   | -2.20597400  | 0.72545100  |
| C | 2.11206900   | -1.35836500  | 0.57217800  |
| C | 2.25895200   | 1.04356900   | -1.73747100 |
| C | 3.45333200   | 1.74150100   | -1.89895000 |
| C | 3.79896100   | 2.82219400   | -1.05802600 |
| C | 2.87594000   | 3.17743200   | -0.04831100 |
| C | 1.67787900   | 2.48710700   | 0.10666000  |
| C | -1.31535400  | 2.71044800   | -1.19529900 |
| C | -2.41163400  | 3.55270800   | -1.02299400 |
| C | -3.38377000  | 3.30633300   | -0.02893000 |
| C | -3.19672700  | 2.17053900   | 0.79175800  |
| C | -2.10837200  | 1.32331200   | 0.61278500  |
| C | -5.08747300  | -3.51417600  | -1.28061100 |
| C | -5.57181100  | -4.57365600  | -0.59085200 |
| C | -6.84936700  | -5.25667200  | -0.80566200 |
| C | 4.51744200   | -4.24953600  | -0.01170000 |
| C | 5.54661400   | -4.17951400  | 0.86479200  |
| C | -4.51183000  | 4.23004900   | 0.10433800  |
| C | -5.55494700  | 4.12351900   | 0.96075700  |
| C | -6.68235500  | 5.04820500   | 1.09703800  |
| C | 5.07135900   | 3.51260100   | -1.27816400 |
| C | 5.56463700   | 4.55750200   | -0.57307300 |
| C | -10.60923800 | -7.39352100  | -1.26607100 |
| C | -11.11597600 | -7.83440500  | -2.52231800 |
| C | -12.58492600 | -8.27511600  | -2.55763500 |
| C | -12.92043200 | -9.12471800  | -1.30777400 |
| C | -12.54564400 | -8.35450300  | -0.04808700 |
| C | -11.36065800 | -7.60524800  | -0.08864500 |
| C | -12.97014400 | -9.05536500  | -3.81538000 |
| C | -14.17783800 | -9.77498900  | -3.77551200 |
| C | -14.90271900 | -9.94958400  | -2.58808100 |

Ground state P.E = -6270.484254 Hartree; Number of imaginary frequency = 0



**Table S3: Cartesian coordinate of DHP-TPE (1o)**

|            |                     |                     |                    |
|------------|---------------------|---------------------|--------------------|
| <b>0 1</b> |                     |                     |                    |
| <b>H</b>   | <b>-11.65554100</b> | <b>-11.35645700</b> | <b>1.52817000</b>  |
| <b>H</b>   | <b>-12.24224200</b> | <b>-10.94184500</b> | <b>3.14054800</b>  |
| <b>C</b>   | <b>-0.05230000</b>  | <b>1.02951000</b>   | <b>0.17267900</b>  |
| <b>C</b>   | <b>1.22183600</b>   | <b>1.80353000</b>   | <b>0.24969800</b>  |
| <b>C</b>   | <b>13.62738700</b>  | <b>8.41749800</b>   | <b>0.08517300</b>  |
| <b>C</b>   | <b>-9.34399500</b>  | <b>6.78231400</b>   | <b>-1.39165300</b> |
| <b>H</b>   | <b>-11.61365200</b> | <b>5.39352800</b>   | <b>-0.61937800</b> |
| <b>H</b>   | <b>-9.48791900</b>  | <b>9.35531300</b>   | <b>-0.92384500</b> |
| <b>H</b>   | <b>9.56412200</b>   | <b>-4.60047600</b>  | <b>-3.66188500</b> |
| <b>C</b>   | <b>-7.24701400</b>  | <b>6.21313600</b>   | <b>-0.26638300</b> |
| <b>C</b>   | <b>8.09498700</b>   | <b>-6.40114200</b>  | <b>-1.17926500</b> |
| <b>C</b>   | <b>8.53231900</b>   | <b>6.64954000</b>   | <b>0.58098700</b>  |
| <b>H</b>   | <b>-12.26466100</b> | <b>3.11962300</b>   | <b>-0.69105100</b> |
| <b>C</b>   | <b>6.72981700</b>   | <b>-10.87556600</b> | <b>-3.17543500</b> |
| <b>C</b>   | <b>2.62616700</b>   | <b>3.65023100</b>   | <b>-0.50737200</b> |
| <b>C</b>   | <b>-6.64884500</b>  | <b>-5.20037800</b>  | <b>0.84583200</b>  |
| <b>H</b>   | <b>-12.54982600</b> | <b>-6.11771500</b>  | <b>1.85411000</b>  |
| <b>H</b>   | <b>-10.82615000</b> | <b>-10.11597600</b> | <b>2.46442600</b>  |
| <b>H</b>   | <b>-13.25049400</b> | <b>-5.80738400</b>  | <b>3.44627200</b>  |
| <b>H</b>   | <b>-13.97073500</b> | <b>-7.02503700</b>  | <b>2.39650900</b>  |
| <b>C</b>   | <b>-0.08504500</b>  | <b>-0.34673700</b>  | <b>0.19174300</b>  |
| <b>H</b>   | <b>12.73393300</b>  | <b>-8.29519300</b>  | <b>-5.33685500</b> |
| <b>H</b>   | <b>11.23580800</b>  | <b>-8.50929000</b>  | <b>-4.43512800</b> |
| <b>C</b>   | <b>5.91992900</b>   | <b>3.97125500</b>   | <b>1.27928700</b>  |
| <b>C</b>   | <b>-10.28794200</b> | <b>-7.46703700</b>  | <b>1.56851500</b>  |
| <b>C</b>   | <b>3.15069800</b>   | <b>-1.71725900</b>  | <b>-1.29650500</b> |
| <b>C</b>   | <b>3.42967800</b>   | <b>-2.82748500</b>  | <b>-0.46689700</b> |
| <b>C</b>   | <b>2.51861800</b>   | <b>-3.09936400</b>  | <b>0.57725200</b>  |
| <b>C</b>   | <b>-1.34244200</b>  | <b>-1.11489500</b>  | <b>0.43215100</b>  |
| <b>C</b>   | <b>-4.93887000</b>  | <b>-3.38223900</b>  | <b>1.21145100</b>  |
| <b>C</b>   | <b>2.03430100</b>   | <b>-0.91700900</b>  | <b>-1.07845800</b> |
| <b>C</b>   | <b>-3.37183500</b>  | <b>-1.53142900</b>  | <b>1.71913900</b>  |
| <b>H</b>   | <b>9.78986700</b>   | <b>8.89855700</b>   | <b>1.20822800</b>  |

|   |              |              |             |
|---|--------------|--------------|-------------|
| H | -4.85903700  | -4.85100900  | -0.29745600 |
| C | 1.44780000   | 2.91206600   | -0.59188800 |
| C | -1.66740900  | -2.23841400  | -0.36077500 |
| C | 4.84559500   | 4.14922600   | 0.47440100  |
| C | -10.00501500 | 13.68845100  | -3.21954300 |
| C | 4.59198800   | -3.70051200  | -0.63898900 |
| C | -3.71088400  | -2.64232000  | 0.91553300  |
| C | -14.98111600 | 9.82986000   | -2.71905800 |
| C | -5.84319800  | 4.26101100   | -1.07967800 |
| C | -9.35664300  | -10.88582600 | 6.31715900  |
| C | 7.13452900   | 4.78695200   | 1.32205100  |
| C | 11.54764700  | 10.56388900  | 2.42755300  |
| C | -2.82447300  | -2.97684800  | -0.13344100 |
| C | -9.12600200  | 5.69189700   | -2.25954100 |
| C | -7.98999000  | 4.89471300   | -2.14367900 |
| C | 13.04933300  | -8.23065700  | -3.23841500 |
| H | 16.45809000  | 7.24686400   | 3.10209400  |
| C | 9.34386700   | 5.17127300   | 2.30539300  |
| C | 9.55374000   | 6.30742200   | 1.49621500  |
| C | 2.21908000   | 1.49254900   | 1.20054700  |
| C | -11.74957500 | 13.31876900  | -4.98738900 |
| C | -5.41967900  | -4.46223800  | 0.55108700  |
| C | 5.59261300   | -3.55650900  | -1.53994900 |
| C | -11.50336800 | 13.38901000  | -3.45489900 |
| C | -15.21303900 | 4.60512100   | 0.42790500  |
| C | 11.20000200  | 12.25490100  | 4.99816400  |
| C | 7.35452100   | 5.91436200   | 0.49821100  |
| C | 11.14509500  | -9.15960000  | -1.52277500 |
| H | -14.52897100 | -6.08598700  | -1.79200400 |
| H | -8.35667100  | -7.91671600  | -0.34740600 |
| H | 16.89479800  | -4.29521700  | -0.33804000 |
| C | -10.72483200 | -7.67443900  | 2.99653700  |
| C | 9.20767200   | -10.40793500 | -3.19655600 |
| C | 12.82396300  | -6.93127000  | -2.72080700 |
| C | -12.08590600 | -7.58861300  | 3.36980600  |
| H | 13.07069400  | 14.26344900  | 4.91475800  |
| C | -14.10945000 | -9.46036400  | 1.93890700  |

|   |              |              |             |
|---|--------------|--------------|-------------|
| C | -4.79531400  | 4.36970200   | -0.22887500 |
| H | -0.70499700  | 3.25138900   | 1.61737000  |
| H | 6.50475600   | -9.81114900  | -3.04975700 |
| C | -14.17071400 | 4.21585800   | -0.65654100 |
| H | -1.98827700  | 0.05983000   | 2.12340600  |
| H | -16.23968400 | -6.05134100  | -2.25171800 |
| C | 3.39058200   | 2.23660100   | 1.29207800  |
| H | 12.40704600  | -9.83666800  | -4.54218600 |
| H | 11.70331300  | -7.57021900  | -0.16574100 |
| C | -9.19972100  | -9.34778000  | 6.16279800  |
| H | -7.30186500  | -4.03993100  | 2.55857700  |
| C | -13.03910700 | 3.41385500   | 0.02630400  |
| C | 11.37853900  | -10.45975500 | -2.03854100 |
| C | -12.87738700 | 9.82894500   | -1.30105000 |
| C | 8.16341900   | 4.43684600   | 2.22370300  |
| H | 7.58279900   | -3.19606200  | -3.28029000 |
| H | 6.79352300   | -11.32719800 | -2.17867600 |
| H | -17.23374500 | -9.34781200  | -0.77040400 |
| H | -7.56310400  | -7.97351600  | 5.64405200  |
| H | -16.02759600 | 8.19164000   | -3.50468200 |
| C | 13.38687000  | 13.34193300  | 4.41272600  |
| C | 7.72860500   | -4.08868600  | -2.67791100 |
| C | -12.30813800 | -8.66463900  | 0.53833700  |
| C | 15.04532400  | -6.96689700  | -1.65066000 |
| C | 15.43532700  | 8.98711400   | 2.53361200  |
| H | 9.16543800   | -12.82571300 | -4.73147400 |
| C | 13.88793800  | -10.47804300 | -2.41275800 |
| C | 12.53991200  | 11.34827300  | 3.04422800  |
| H | -11.05467900 | 8.64083300   | -3.96055100 |
| H | 18.37941800  | -6.02738300  | -1.28906000 |
| H | 13.92758500  | 2.94304700   | -1.93827200 |
| C | -13.02034500 | -6.59558000  | 2.71529400  |
| C | -2.21918300  | -0.78565000  | 1.48522200  |
| C | -12.74275700 | -9.53318900  | 1.57514700  |
| C | 1.13307800   | -1.18226400  | -0.02355700 |
| C | -1.28923300  | 1.85969600   | 0.07285600  |
| H | -10.36713400 | -11.16013600 | 6.63850700  |

|   |              |              |             |
|---|--------------|--------------|-------------|
| C | 3.63092800   | 3.33334700   | 0.43302700  |
| C | -3.43044800  | 2.36974300   | -0.99112800 |
| C | -13.74078900 | 10.48710000  | -2.21633600 |
| C | -14.64363000 | -8.39714700  | -0.21333600 |
| H | 7.41513600   | -13.05672800 | -4.62883700 |
| H | -5.50033300  | -2.99240500  | 2.05883700  |
| C | 13.22121400  | 9.18964200   | 1.31840000  |
| C | -15.04580100 | -8.95874300  | 1.00892200  |
| H | -3.03999400  | -3.82383800  | -0.77626300 |
| H | 2.70229500   | -3.94939900  | 1.22880100  |
| H | -12.80742900 | 13.15695200  | -5.22051800 |
| C | -7.01561100  | 5.13434300   | -1.15014000 |
| C | -15.53470900 | -6.38864700  | -1.48169100 |
| H | -11.17531600 | 12.49971500  | -5.43546800 |
| C | -12.30600700 | 5.90264000   | -1.27847300 |
| C | -8.67536700  | -5.62353300  | 2.14335400  |
| C | 8.27889200   | -12.60894100 | -4.12427500 |
| H | 8.68075600   | 7.48813400   | -0.09138900 |
| C | -10.96382200 | -8.02997500  | 0.51439400  |
| C | 13.26095300  | 2.36552200   | 0.68953800  |
| H | 13.90489700  | 12.72272900  | 5.15421900  |
| H | -13.40502700 | 14.41467100  | -3.01794400 |
| H | 8.83371600   | -10.60001400 | -5.95481200 |
| C | -14.54112700 | -9.59843600  | 3.35889500  |
| H | -6.54235900  | 6.41910600   | 0.53250700  |
| H | 6.60284400   | 6.21098300   | -0.22578200 |
| H | 10.27992700  | 11.78112600  | 4.63976300  |
| H | -16.09418800 | -8.97328600  | 1.28574800  |
| H | 10.49889500  | 10.78511400  | 2.60595300  |
| C | 12.29754800  | -8.75636100  | -4.43858500 |
| C | 12.08524800  | 6.37647100   | 1.91664700  |
| H | -13.39043800 | 9.60233800   | 0.74614400  |
| H | -12.85743000 | 8.08616400   | 0.02435400  |
| C | 10.29570800  | -6.88293200  | -2.29992200 |
| C | 10.79842800  | 7.10836100   | 1.62894400  |
| H | 13.46342900  | 1.47020200   | 0.08861100  |
| C | 14.19028300  | 9.73435900   | 2.19588600  |

|   |              |              |             |
|---|--------------|--------------|-------------|
| H | 8.39553900   | -13.10445100 | -3.15357500 |
| C | -11.94413100 | 12.06925700  | -2.78825900 |
| C | 13.05420400  | 6.90965400   | 2.80366900  |
| C | 13.86313500  | -6.29790300  | -1.99970200 |
| H | -15.77132100 | -5.86687000  | -0.54724700 |
| H | -5.84586700  | 3.45183900   | -1.80807100 |
| H | 5.56695900   | -2.70729800  | -2.22080900 |
| C | -11.80956500 | -10.52401700 | 2.23044600  |
| H | 14.10314600  | 13.61406900  | 3.62903000  |
| H | 17.27174100  | -6.38760200  | 0.97821600  |
| H | 2.06240100   | 0.65883100   | 1.87580200  |
| C | 12.64595400  | 7.68153600   | 4.03869800  |
| H | 15.86012500  | -8.96359600  | -1.44754800 |
| H | 7.70156200   | -9.38964700  | -5.32537500 |
| H | 8.02687100   | 3.57299800   | 2.86862400  |
| H | -12.04318000 | 15.50854300  | -3.32780000 |
| H | -7.84484900  | 4.06907700   | -2.83512400 |
| C | 11.85890700  | 9.44350100   | 1.63048500  |
| H | 5.89136500   | -11.33924300 | -3.70993900 |
| H | -9.85436100  | 5.48026700   | -3.03508300 |
| C | 15.49550300  | 7.65278400   | 2.79218100  |
| H | 12.83906200  | 7.04971700   | 4.91741500  |
| H | -15.67979800 | 3.80635700   | -2.21091500 |
| C | 8.85720100   | -4.87749800  | -2.88684100 |
| C | -6.99211800  | -6.30807200  | 0.03975600  |
| C | -11.48608900 | 10.03289100  | -1.47487000 |
| H | -15.82047400 | 10.48144400  | -2.95982600 |
| H | -6.32911400  | -6.59307100  | -0.77275600 |
| C | -13.90520300 | -9.03948100  | 4.42377300  |
| H | 13.52568200  | 2.14743500   | 1.73064400  |
| H | -1.00119900  | -2.52577700  | -1.16767300 |
| C | -12.13035900 | 8.48971100   | -4.06776300 |
| H | 4.12333100   | 1.96725700   | 2.04532600  |
| H | -8.65129400  | -11.26534100 | 7.06687500  |
| H | -12.16046000 | 14.64540400  | -1.77834700 |
| C | -12.52810700 | -8.45908600  | 4.40375100  |
| H | -4.02622500  | -1.25749800  | 2.54215800  |

|   |              |              |             |
|---|--------------|--------------|-------------|
| C | 10.37404400  | -11.08417200 | -2.80609300 |
| C | -17.10124000 | -8.27113400  | -0.92688500 |
| H | -4.17403100  | 2.11477500   | -1.73874200 |
| C | -15.63933100 | -7.92742100  | -1.29433400 |
| C | 12.73313300  | -11.08978700 | -2.03459700 |
| H | -15.98866300 | -8.30009800  | -3.42481900 |
| C | -9.49266900  | -8.66517500  | 7.52735900  |
| C | -15.29928800 | -8.62994500  | -2.63759800 |
| H | -8.74950500  | -8.23510800  | 3.61570300  |
| H | -14.47251900 | 8.72415300   | -0.33629000 |
| C | 7.91260700   | -10.46300400 | -5.37659700 |
| C | 14.41597300  | 6.66388900   | 2.49297400  |
| C | 17.52020400  | -6.50114200  | -1.78002000 |
| C | -3.62266500  | 3.49625800   | -0.15895200 |
| H | -8.80291500  | -9.03783400  | 8.29484700  |
| C | -1.46808000  | 2.99462300   | 0.89001700  |
| C | -2.61062900  | 3.78445300   | 0.78287300  |
| C | 14.74351800  | 5.57878600   | 1.65483600  |
| H | 10.11446400  | 4.87362600   | 3.00850800  |
| C | -2.29541200  | 1.57414000   | -0.87636700 |
| H | 15.91015200  | 3.01376300   | 1.24133000  |
| H | 10.91862000  | 13.15766700  | 5.55454400  |
| H | 12.77202900  | -12.16445400 | -1.85856700 |
| H | -9.15402900  | -11.39392400 | 5.36733400  |
| H | 12.18470200  | 2.56430000   | 0.64979100  |
| H | 14.79485000  | -11.08168200 | -2.42503500 |
| H | 8.39335100   | -8.41429900  | -3.39275400 |
| H | 0.69283100   | 3.18895800   | -1.32026300 |
| H | 15.79400700  | 5.37279100   | 1.48125800  |
| H | 15.53067400  | -6.72733600  | 1.08653400  |
| H | -2.72793100  | 4.64540100   | 1.43546200  |
| C | -8.14623900  | -7.05187600  | 0.27306400  |
| C | 16.42776600  | -6.87490400  | 0.47428800  |
| H | 10.54928800  | -12.10213800 | -3.13651100 |
| H | 6.24538300   | -5.92083400  | -0.22264700 |
| C | 10.15394000  | -8.37887400  | -2.16955500 |
| H | -11.94232100 | -9.61782900  | 6.10749600  |

|   |              |              |             |
|---|--------------|--------------|-------------|
| H | 15.85458900  | -4.27271700  | -1.77265000 |
| H | -13.97256600 | 12.15749800  | -3.54247300 |
| H | -8.54224700  | 7.80736400   | 0.33585200  |
| C | -14.07997300 | 7.45781600   | -2.76469600 |
| H | 1.84538600   | -0.07452600  | -1.73429600 |
| H | 5.91653700   | 3.13999100   | 1.98234800  |
| C | -11.58148700 | -8.99849000  | 5.29079000  |
| H | -10.51534700 | -8.86526700  | 7.86484800  |
| H | 14.26834700  | 4.67529600   | -1.73480400 |
| H | 17.41521000  | -6.06897000  | -2.78177800 |
| H | 11.67263500  | 4.87500200   | 0.44233700  |
| C | -13.42895000 | 8.99394400   | -0.16955200 |
| C | -12.68186500 | 7.65450600   | -2.93372300 |
| H | -16.06800200 | 5.13648900   | -0.00375200 |
| H | 15.15018000  | -4.52332400  | -0.15994800 |
| H | 13.02608200  | 7.52648400   | -0.09638500 |
| C | 16.22985500  | -6.27456800  | -0.94501900 |
| C | 1.39446000   | -2.30438200  | 0.78932400  |
| C | 14.08206700  | 3.57086400   | 0.15401300  |
| C | 9.17301200   | -9.02378500  | -2.94744800 |
| C | -7.52361600  | -4.87996400  | 1.90881000  |
| C | -14.84898300 | 3.29749400   | -1.71027900 |
| H | 16.63646500  | -7.94932500  | 0.43388300  |
| H | -15.59399200 | 3.70574800   | 0.92752800  |
| C | -10.53590900 | 7.65311800   | -1.56049800 |
| C | 15.06930700  | -8.35687600  | -1.88012300 |
| H | 16.32590900  | 9.57935900   | 2.74145700  |
| H | 17.74129200  | -7.56770900  | -1.89504100 |
| H | -15.38507600 | -9.71819200  | -2.53918100 |
| C | -9.02679500  | -6.72015900  | 1.32362800  |
| H | -9.32711200  | -5.35443000  | 2.96793800  |
| H | -4.78757900  | 5.18485100   | 0.49288300  |
| H | -17.42619300 | -7.74776000  | -0.02019300 |
| H | -14.37159500 | -9.15591600  | 5.40164500  |
| H | -14.12970800 | 2.99057800   | -2.47826400 |
| H | -14.75993200 | 5.25328900   | 1.18681700  |
| H | 7.09000000   | -10.94144900 | -5.92254100 |

|   |              |              |             |
|---|--------------|--------------|-------------|
| C | 13.75966000  | 4.81706600   | 1.00463700  |
| C | 12.44196700  | 5.30378300   | 1.07621300  |
| H | 4.85165800   | 4.97564500   | -0.23444000 |
| C | 6.96886200   | -5.61211400  | -0.96989000 |
| C | -13.26314000 | -8.17629800  | -0.37611000 |
| C | 8.05312800   | -11.08824700 | -3.96122600 |
| C | 15.58128700  | 3.19803600   | 0.21212300  |
| H | 11.68844400  | 11.56177200  | 5.69272600  |
| H | 10.52397500  | 13.15543600  | 2.43874600  |
| H | 12.63564300  | 4.04927400   | -1.44258000 |
| H | 14.62853200  | 11.28846600  | 3.60822600  |
| C | -10.46674600 | 8.98165600   | -1.22026500 |
| H | -9.36156100  | 12.93011100  | -3.68035600 |
| C | -9.79438900  | -8.23548300  | 3.90059200  |
| H | 16.21290500  | 3.98467800   | -0.21672000 |
| C | -7.73282700  | -9.04791200  | 5.77757500  |
| C | 16.01110200  | -4.75108000  | -0.79902200 |
| H | 0.71093200   | -2.54682400  | 1.59629400  |
| H | -9.76855700  | 13.73864500  | -2.15052600 |
| H | -9.98167500  | 11.37130000  | -2.21398800 |
| H | -11.44013700 | 14.25682400  | -5.46486800 |
| C | 13.85156900  | 10.84959500  | 2.99203900  |
| C | -13.28015700 | 11.63406600  | -2.88886400 |
| C | 12.15166500  | 12.62072000  | 3.82578000  |
| C | -8.38063700  | 7.01041800   | -0.38253500 |
| C | -14.52773700 | 6.33954800   | -2.04117100 |
| H | 15.75505300  | 2.28292800   | -0.36543800 |
| C | 6.75612300   | -4.42782600  | -1.71157000 |
| C | 11.48209400  | -6.29528200  | -2.66374300 |
| C | 10.76955700  | 8.46046800   | 1.39228000  |
| H | -9.36883600  | -7.57870800  | 7.45248100  |
| H | -7.44270800  | -9.55939900  | 4.85264900  |
| H | -9.74865100  | 14.65561100  | -3.66687600 |
| H | 11.53766100  | -9.16780600  | 0.57017700  |
| C | -13.64155600 | 5.48323700   | -1.35942600 |
| H | 13.49613900  | 9.07846000   | -0.78417000 |
| H | -13.45186400 | 2.50060300   | 0.46993400  |



|   |              |              |             |
|---|--------------|--------------|-------------|
| H | -12.60779100 | 9.46453200   | -4.17352900 |
| H | -10.57814400 | -7.81073800  | -0.48003100 |
| H | -12.90987700 | -7.56484100  | -1.20189700 |
| H | -12.56320700 | 3.98660200   | 0.83049200  |
| H | 11.13008500  | 14.51286400  | 3.40656700  |
| H | 8.23026900   | -7.30565000  | -0.59563500 |
| H | 13.70011000  | -5.27648200  | -1.67409200 |
| H | 11.48675700  | -5.20765600  | -2.71636900 |
| C | 14.05360000  | -9.00830200  | -2.60338200 |
| C | -10.19614400 | -8.81800100  | 5.11087100  |
| C | -11.04985500 | 11.19472800  | -2.15330200 |
| C | -15.07941100 | 8.52240700   | -3.08175100 |
| H | 4.62623000   | -4.53961400  | 0.05393600  |
| H | 2.77905100   | 4.49095400   | -1.17868700 |
| H | -7.06503200  | -9.39821000  | 6.57292300  |
| H | 13.19959100  | 8.60992400   | 4.18285000  |
| C | 11.42640600  | 13.60468000  | 2.86699700  |
| H | 12.08339900  | 13.89540200  | 2.03924600  |
| C | 13.70231100  | 3.82816200   | -1.33042700 |
| H | -12.29603000 | 7.94485300   | -5.00803300 |
| H | 11.57921400  | 7.91199800   | 4.02856900  |
| H | -14.27885200 | -8.40068100  | -2.96281800 |
| H | -15.24456800 | 2.39431100   | -1.22920600 |
| H | 3.80787300   | -1.48264600  | -2.12714700 |
| C | 11.89704300  | -8.63309200  | -0.32059600 |
| H | -17.76702600 | -7.96487200  | -1.74182700 |
| C | -11.82651400 | 7.01390900   | -2.00783800 |
| H | -2.17550300  | 0.71792000   | -1.53072200 |
| H | -15.59931100 | 6.17416700   | -1.96886100 |
| H | 14.67928700  | 8.13040500   | 0.11994900  |
| H | -15.51919300 | -10.04452600 | 3.53639200  |
| C | 9.07823600   | -6.04791900  | -2.13147300 |
| C | -12.33132200 | 14.56004200  | -2.85762400 |
| H | 12.97578600  | -8.78449200  | -0.37232900 |

Ground state P.E = -6270.366058 Hartree; Number of imaginary frequency = 0

## Reference:

- 1 M. Tashiro and T. Yamato, *J. Am. Chem. Soc.*, 1982, **104**, 3701–3707.
- 2 R. H. Mitchell, Y. H. Lai and R. V. Williams, *J. Org. Chem.*, 1979, **44**, 4733–4735.
